# Supplementary material for: Functionalization of PET with Phosphazene Grafted Graphene Oxide for Synthesis, Flammability, and Mechanism
Source: PubMed Central journal article supplement (PMC8002576; doi:10.3390/ma14061470), 2021-03-17
Supplement: materials-14-01470-s001.pdf [file materials-14-01470-s001.pdf]

Supplementary Material

# Functionalization of PET with Phosphazene Grafted Graphene Oxide for Synthesis, Flammability, and Mechanism

Lifei Wei <sup>1,2</sup>, Rui Wang <sup>2,\*</sup>, Zhiguo Zhu <sup>2</sup>, Wenqing Wang <sup>2</sup> and Hanguang Wu <sup>2</sup>

- <sup>1</sup> Polymer Research Institute, Sichuan University, No.24 South Section 1, Yihuan Road, Chengdu 610065, China; wlf13581518318@163.com
- <sup>2</sup> School of Material Science and Engineering, Beijing Institute of Fashion Technology, No. A2, East Yinghua Street, Chaoyang District, Beijing 100029, China; clyzzg@bift.edu.cn (Z.Z.); 20180021@bift.edu.cn (W.W.); 20180064@bift.edu.cn (H.W.)
- \* Correspondence: clywangrui@bift.edu.cn; Tel.: +86-010-64288279

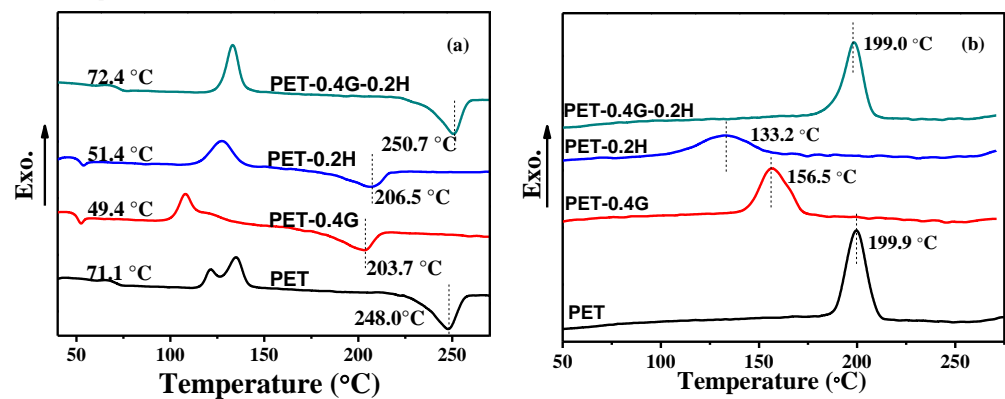

**Figure S1.** Differential scanning calorimetry (DSC) curve of neat PET and its composites: (a) heat curve; (b) cool curve.

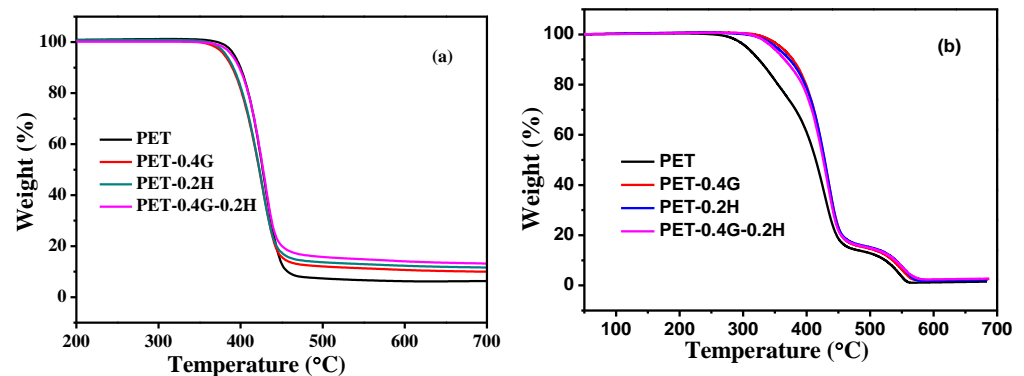

**Figure S2.** Thermogravimetric analysis (TGA) curve of neat polyethylene terephthalate (PET) and its composites: (a) N<sub>2</sub>; (b) Air.

**Publisher's Note:** MDPI stays neutral with regard to jurisdictional claims in published maps and institutional affiliations.

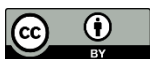

**Copyright:** © 2021 by the authors. Licensee MDPI, Basel, Switzerland. This article is an open access article distributed under the terms and conditions of the Creative Commons Attribution (CC BY) license (<http://creativecommons.org/licenses/by/4.0/>).

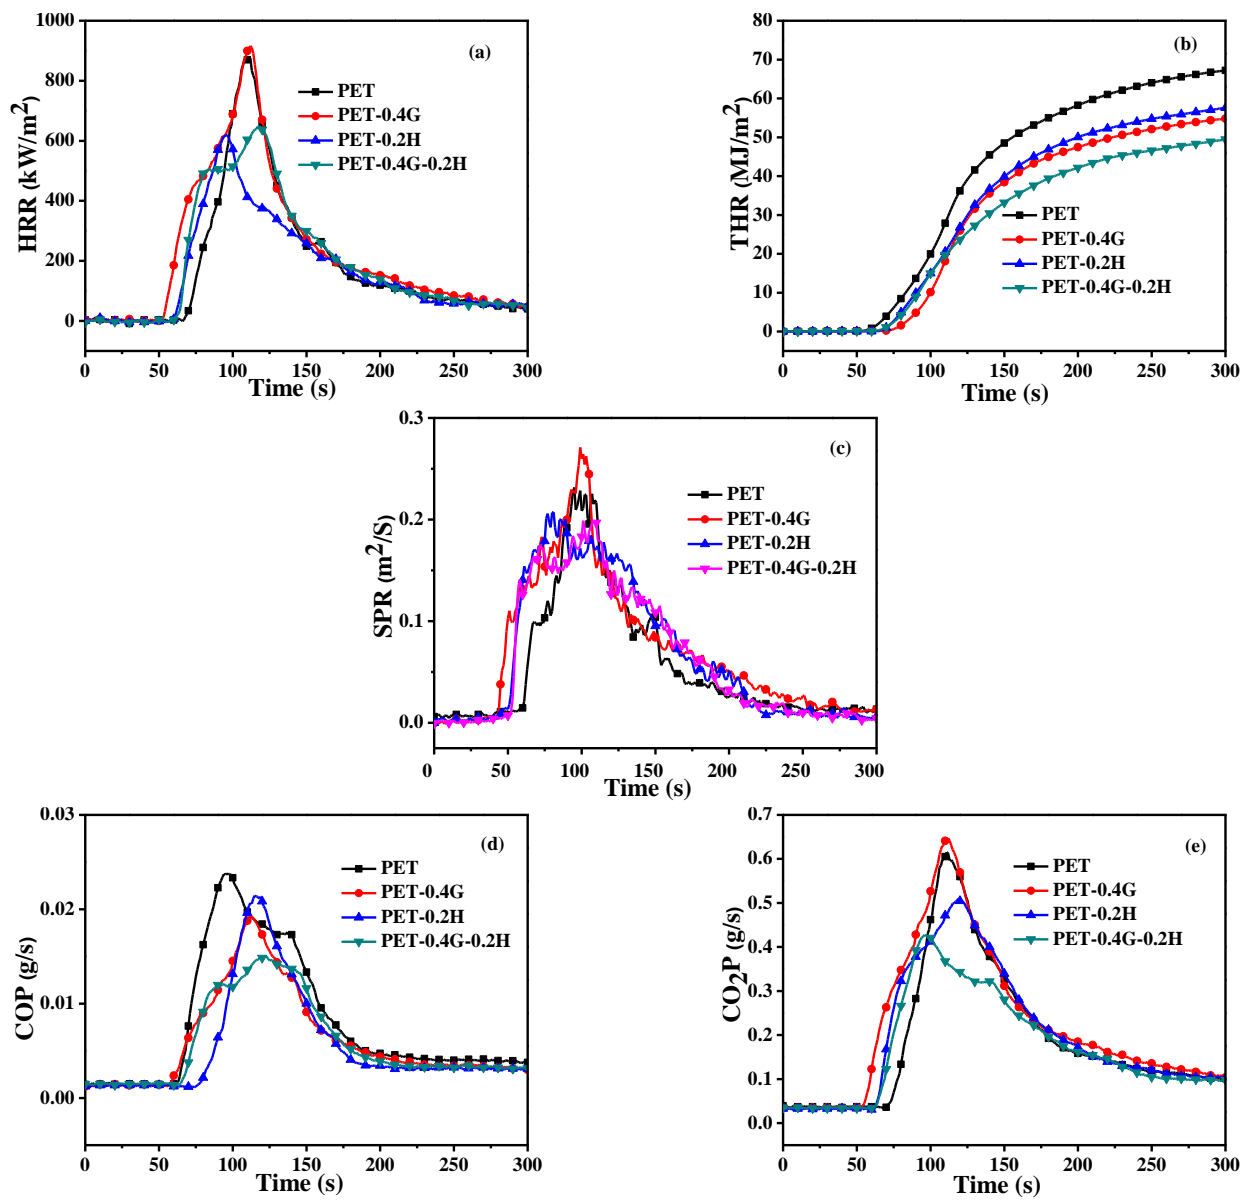

Figure S3. (a) Heat release rate, (b) total heat release, (c) smoke production rate, (d) CO production and (e)  $\text{CO}_2$  production versus time curves of neat PET and its composites.
